# Supplementary material for: Investigation of pH-dependent phosphate removal from wastewaters by membrane capacitive deionization (MCDI)
Source: Royal Society of Chemistry journal article supplement (doi:10.1039/c7ew00138j), 2017-01-01
Supplement: c7ew00138j1.pdf [file c7ew00138j1.pdf]

## Supporting Information

# Investigation of pH-dependent phosphate removal from wastewaters by membrane capacitive deionization (MCDI)

*Xin Huang<sup>a</sup>, Di He<sup>b\*</sup>, Wangwang Tang<sup>b</sup>, Peter Kovalsky<sup>b</sup>, T. David Waite<sup>b\*</sup>*

<sup>a</sup>School of Environmental Science and Engineering, Shandong University, Jinan, Shandong  
250100, P.R. China

<sup>b</sup>School of Civil and Environmental Engineering, University of New South Wales, Sydney,  
NSW 2052, Australia

Email addresses: [huangxin1212@163.com](mailto:huangxin1212@163.com) (Xin Huang); [di.he@unsw.edu.au](mailto:di.he@unsw.edu.au) (Di He);  
[tangwangwang89@gmail.com](mailto:tangwangwang89@gmail.com) (Wangwang Tang) [peterkov@gmail.com](mailto:peterkov@gmail.com) (Peter Kovalsky);  
[d.waite@unsw.edu.au](mailto:d.waite@unsw.edu.au) (T. David Waite)

**Environmental Science: Water Research and Technology**

---

\*Corresponding authors: Dr Di He, [di.he@unsw.edu.au](mailto:di.he@unsw.edu.au); Professor T. David Waite,  
[d.waite@unsw.edu.au](mailto:d.waite@unsw.edu.au)

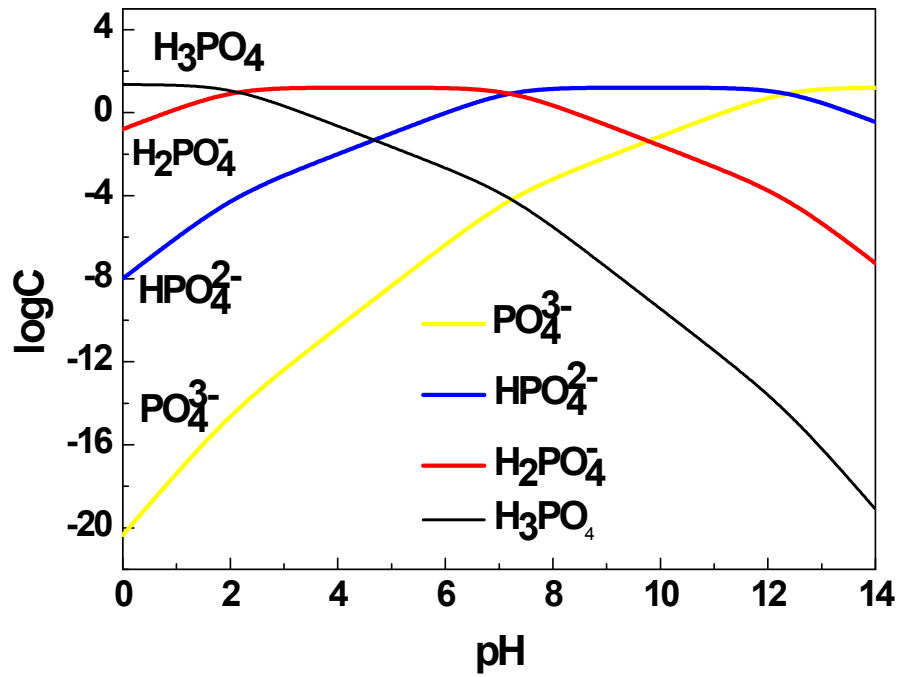

SI Figure S1. Log C-pH diagram of phosphate from pH 0 to pH 14.

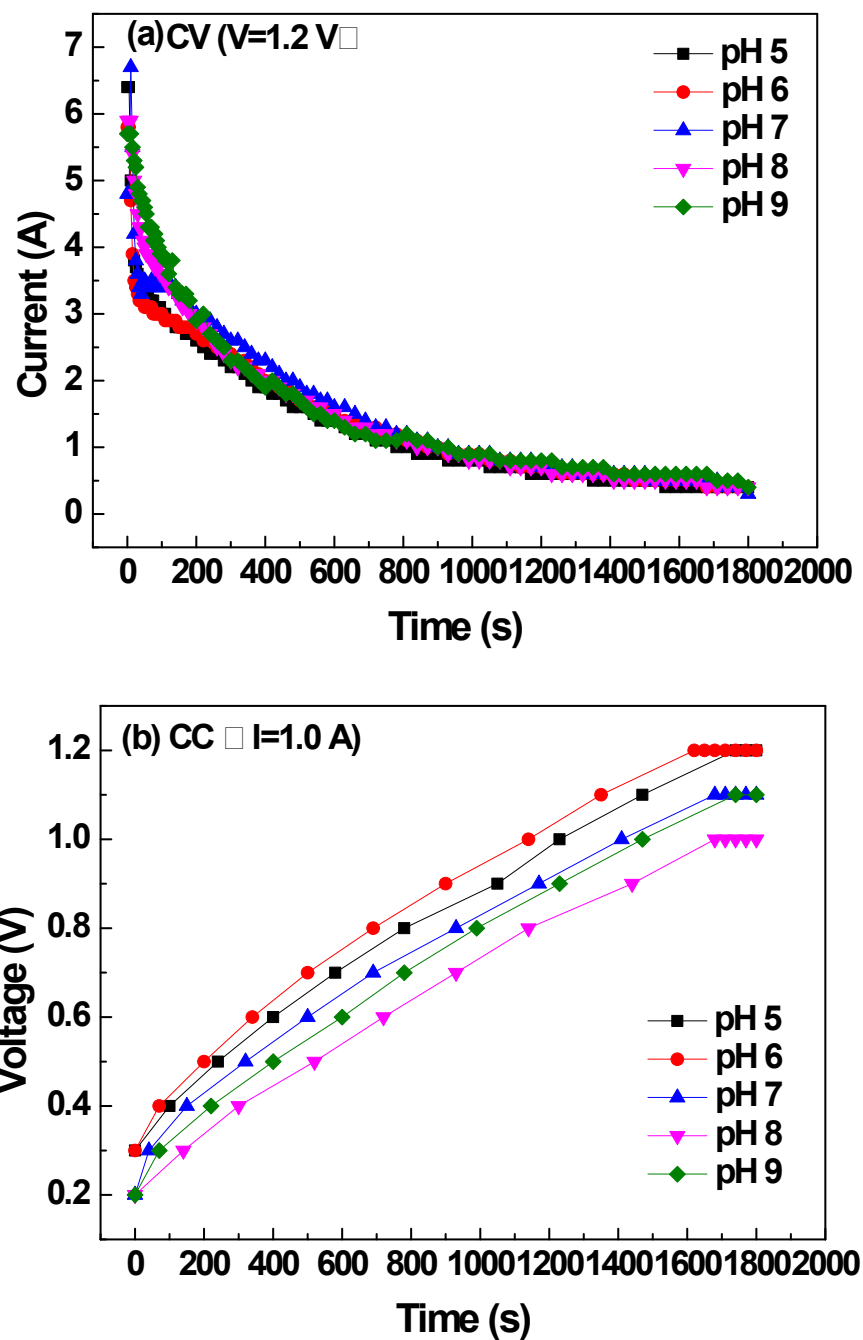

SI Figure S2. Variations of (a) current in CV mode and (b) voltage in CC mode during charging. Experimental conditions:  $[P]_0 = 16.1$  mM.
